# Supplementary material for: Unlocking the chemical environment of nitrogen in perovskite-type oxides
Source: Royal Society of Chemistry journal article supplement (doi:10.1039/d4sc01850h), 2024-01-01
Supplement: d4sc01850h1.pdf [file d4sc01850h1.pdf]

## Supplementary Information

### Unlocking the chemical environment of nitrogen in perovskite-type oxides

Shunsuke Shimizu,<sup>a</sup> Takeharu Yoshii,<sup>\*a</sup> Ginga Nishikawa,<sup>a,b</sup> Jingwen Wang,<sup>a,c</sup> Shu Yin,<sup>a,b</sup> Eiichi Kobayashi,<sup>d</sup> and Hiroto Nishihara<sup>\*a,b</sup>

---

<sup>a</sup>*Institute of Multidisciplinary Research for Advanced Materials, Tohoku University, 2-1-1 Katahira, Aoba-ku, Sendai, Miyagi, 980-8577, Japan.*

<sup>b</sup>*Advanced Institute for Materials Research (WPI-AIMR), Tohoku University, 2-1-1 Katahira, Aoba-ku, Sendai, Miyagi, 980-8577, Japan.*

<sup>c</sup>*School of Environmental Science and Engineering, State Key Laboratory of Metal Matrix Composites, Shanghai Jiao Tong University, Shanghai, 200240, P. R. China.*

<sup>d</sup>*Kyushu Synchrotron Light Research Center, 8-7 Yayoigaoka, Tosu, Saga, 841-0005, Japan.*

*\*Corresponding author*

*E-mail: [takeharu.yoshii.b3@tohoku.ac.jp](mailto:takeharu.yoshii.b3@tohoku.ac.jp); [hirotomo.nishihara.b1@tohoku.ac.jp](mailto:hirotomo.nishihara.b1@tohoku.ac.jp)*

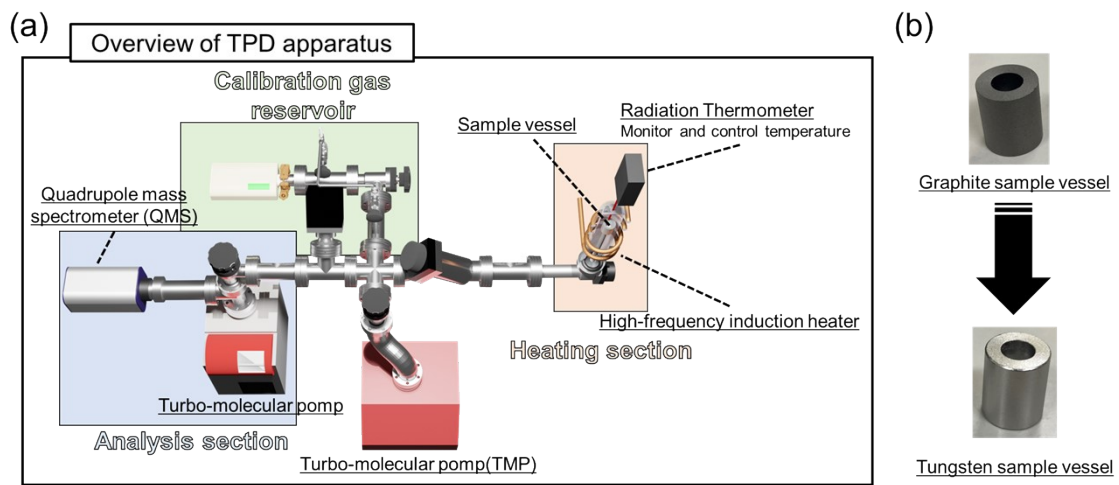

**Fig. S1** (a) Schematic illustration of the advanced TPD device. (b) Photograph of graphite and tungsten sample holders.

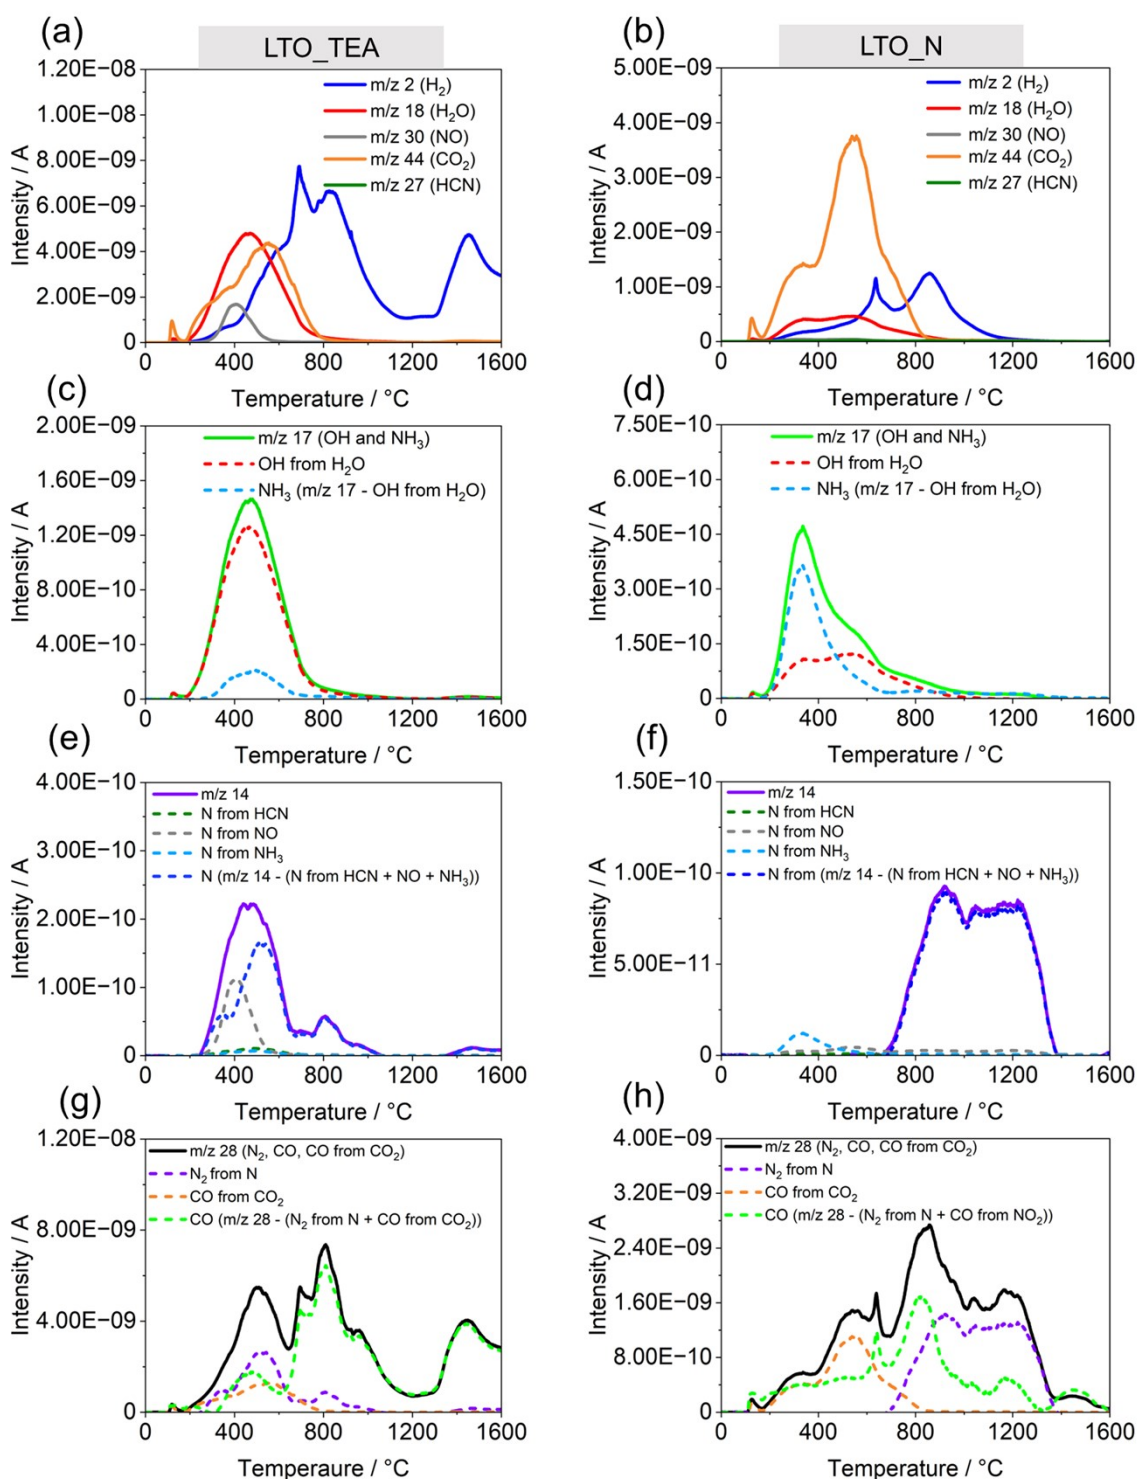

**Fig. S2** TPD profiles of (a) LTO\_TEA and (b) LTO\_N for desorbed species: H<sub>2</sub> (m/z = 2), H<sub>2</sub>O (m/z = 18), NO (m/z = 30), CO<sub>2</sub> (m/z = 44) HCN (m/z = 27). Extraction of NH<sub>3</sub> component from TPD profile of (c) LTO\_TEA and (d) LTO\_N. Separation of TPD profile of (e) LTO\_TEA and (f) LTO\_N. Extraction of CO component from TPD profile of (g) LTO\_TEA and (h) LTO\_N.

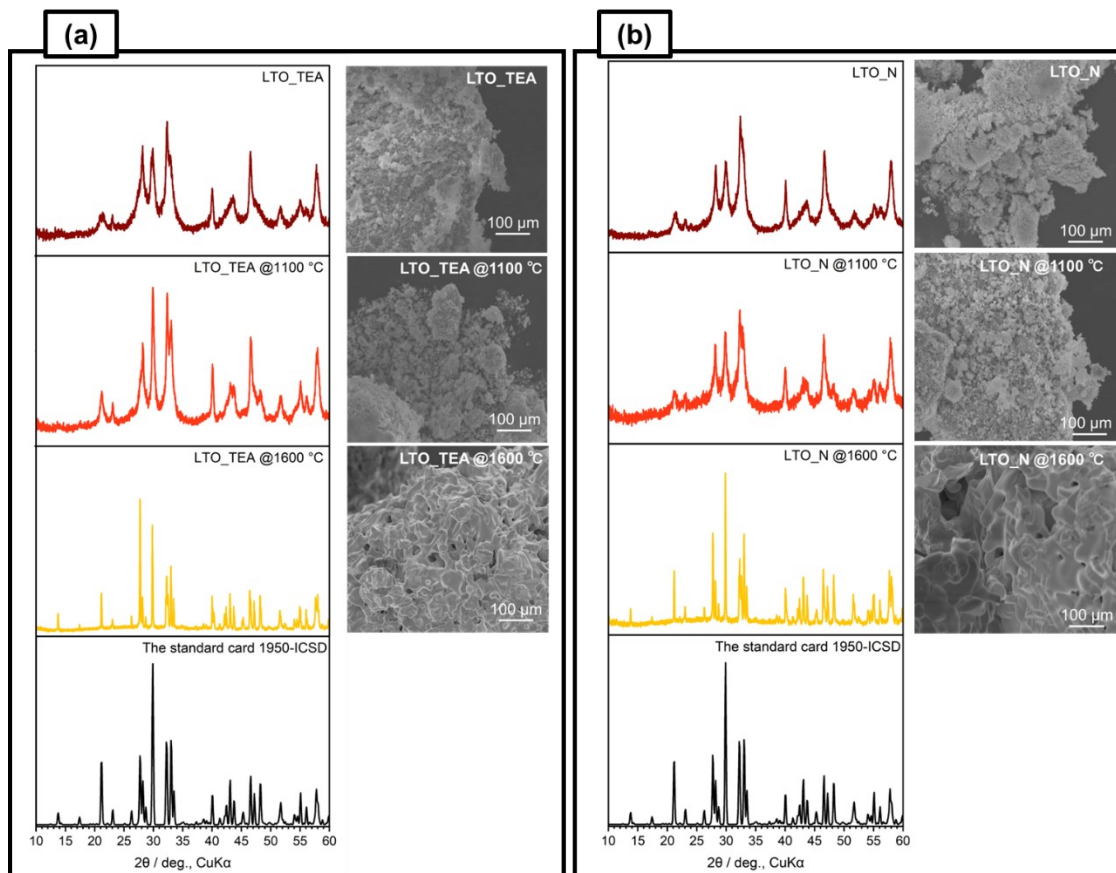

**Fig. S3** Changes in PXRD patterns and SEM images of (a) LTO\_TEA and (b) LTO\_N before and after heat treatment at 1100  $^{\circ}\text{C}$  and 1600  $^{\circ}\text{C}$ , and standard XRD pattern of La<sub>2</sub>Ti<sub>2</sub>O<sub>7</sub> (the standard card 1950-ICSD).

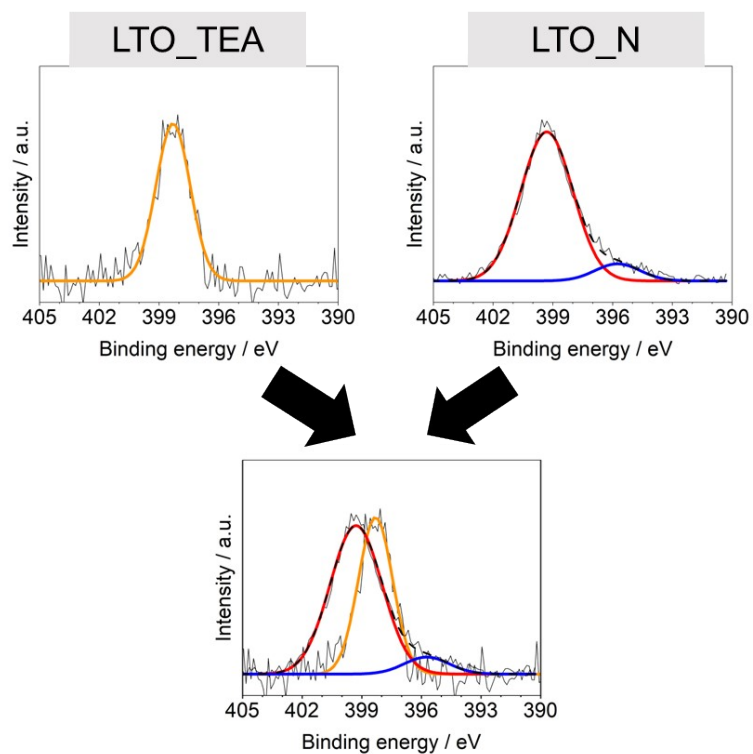

Fig. S4 Overlap of N 1s XPS spectra of LTO\_TEA and LTO\_N.

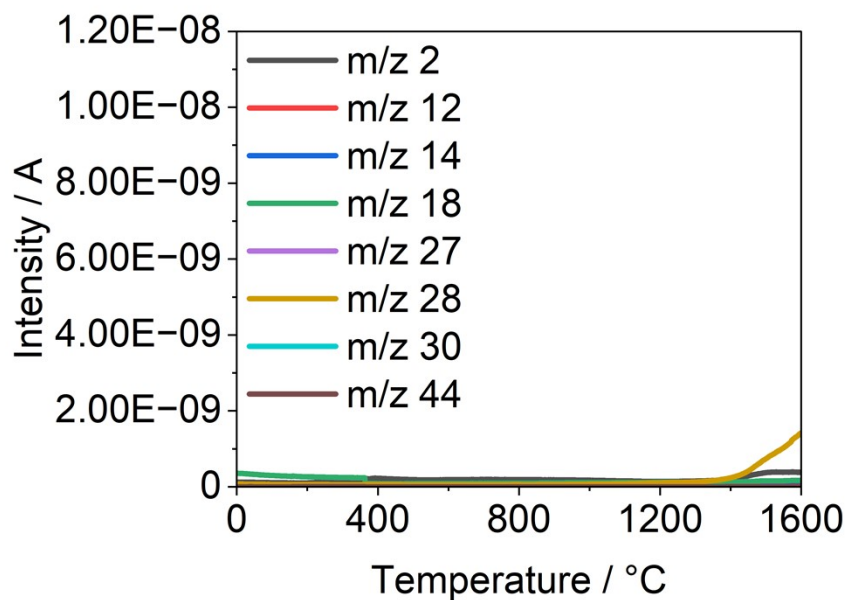

Fig. S5 TPD profiles of blank test with the tungsten holder.

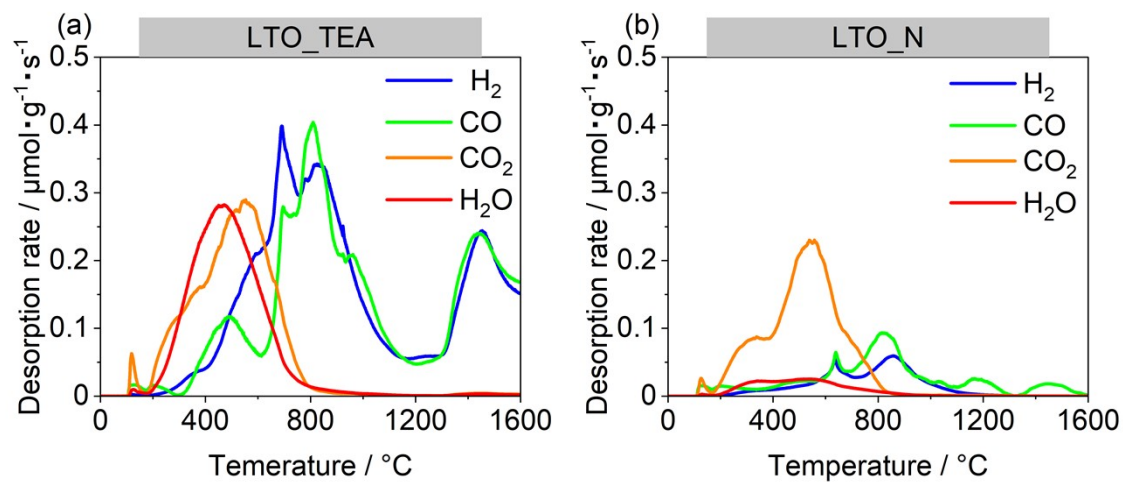

Fig. S6 H<sub>2</sub>, CO, CO<sub>2</sub>, and H<sub>2</sub>O desorption pattern determined by TPD of (a) LTO\_TEa and (b) LTO\_N.

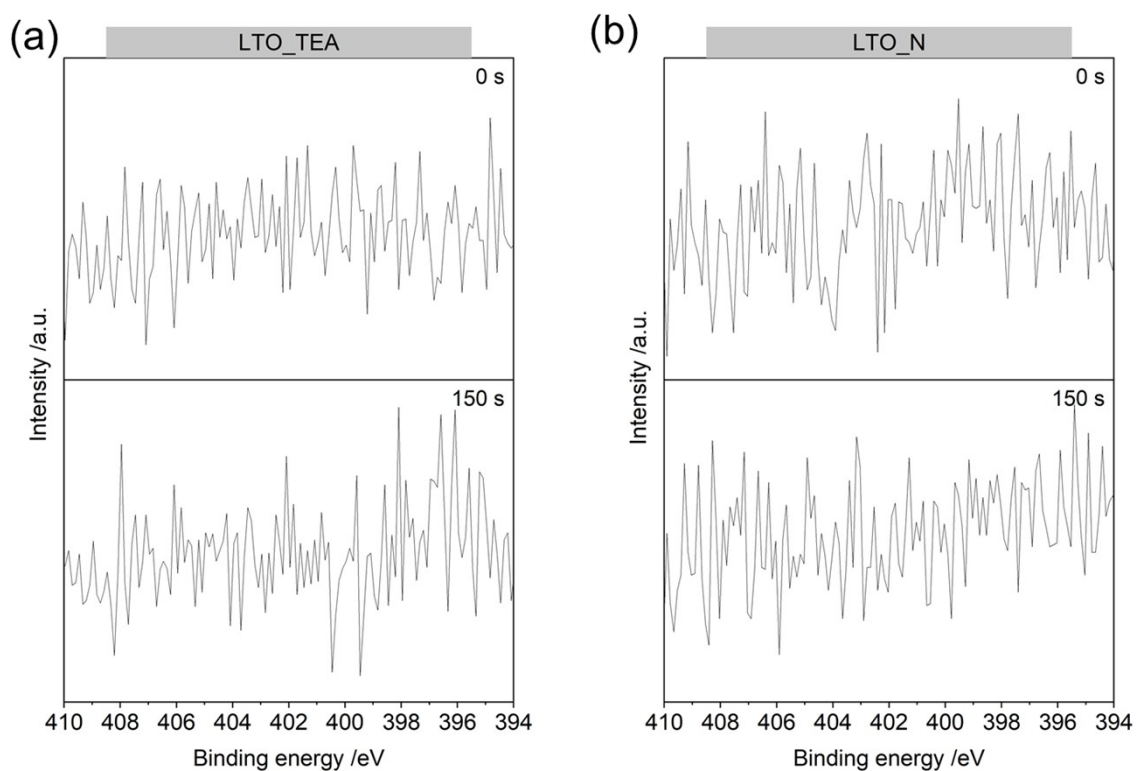

Fig. S7 N 1s XPS spectra of (a) LTO\_TEa and (b) LTO\_N after TPD measurements up to 1600 °C, before and after Ar<sup>+</sup> sputtering for 150 s.

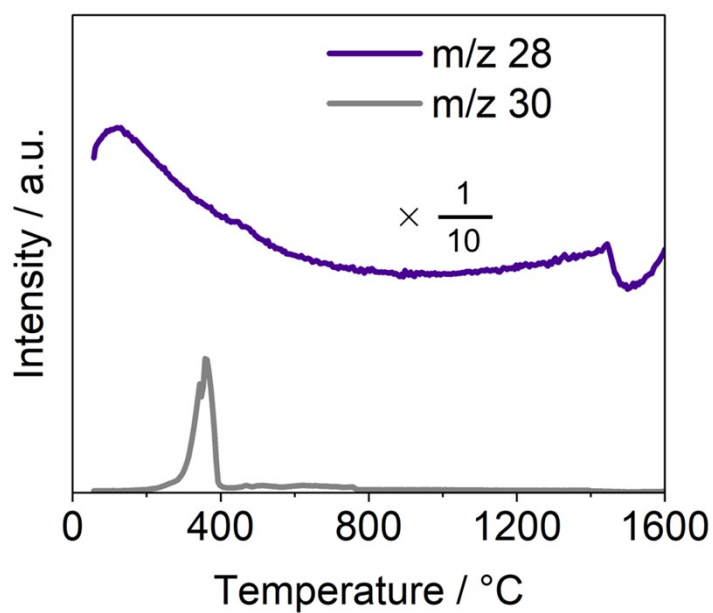

Fig. S8 MS spectra of LTO\_TEA using the commercial TG-MS system under a He flow.

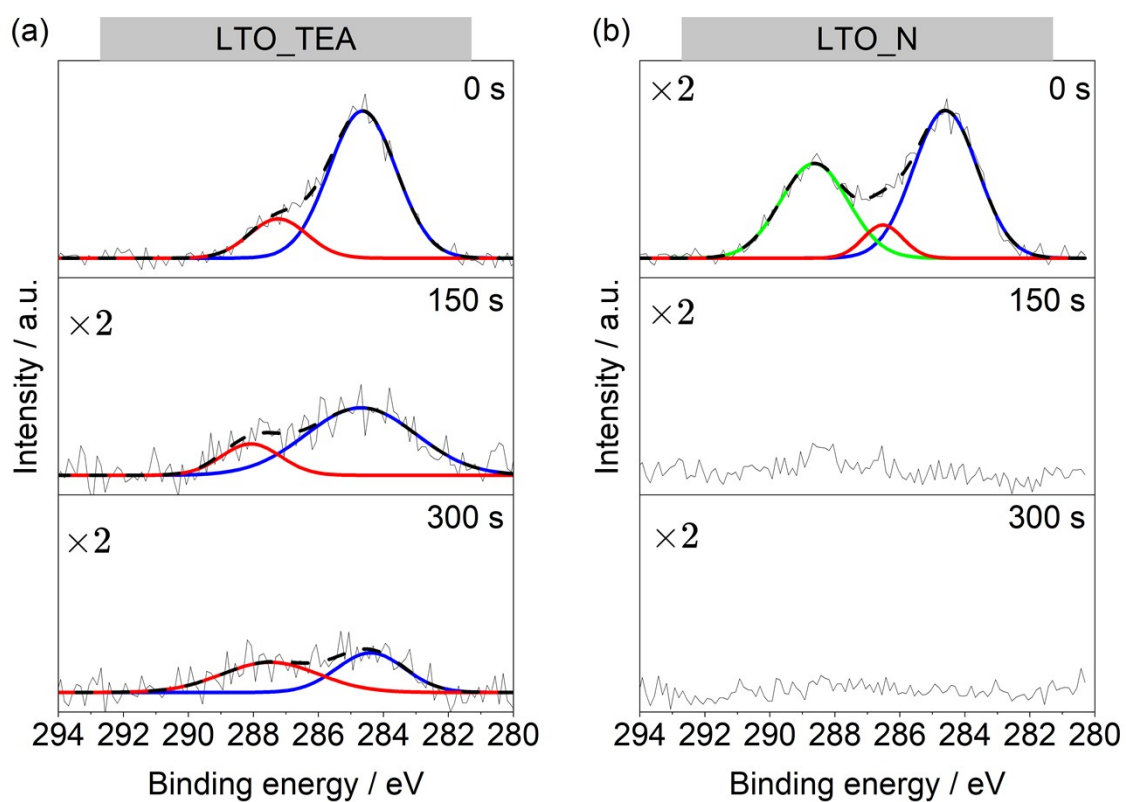

Fig. S9 C 1s XPS spectra of (a) LTO\_TEA and (b) LTO\_N before and after Ar<sup>+</sup> sputtering for 150 s or 300 s.

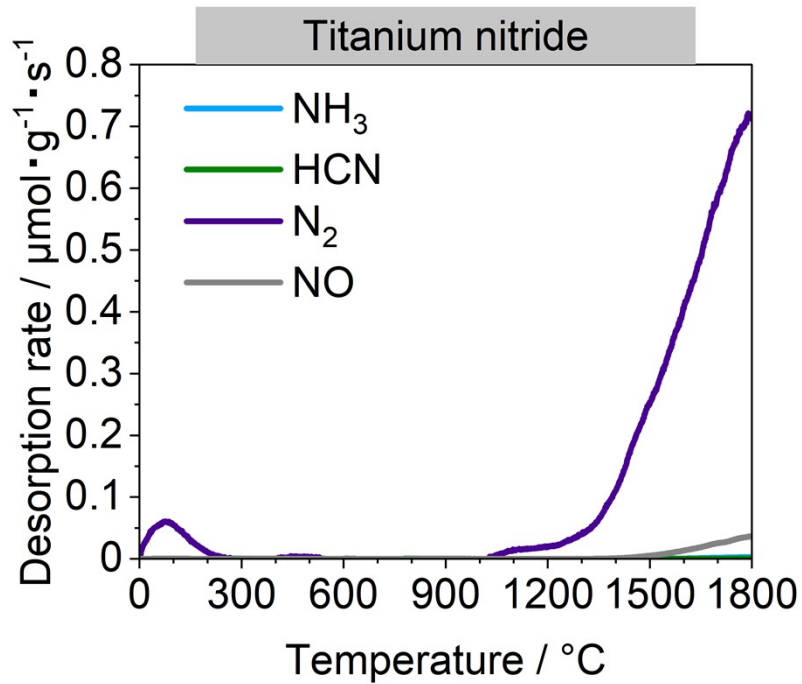

Fig. S10 TPD profile of Titanium nitride.

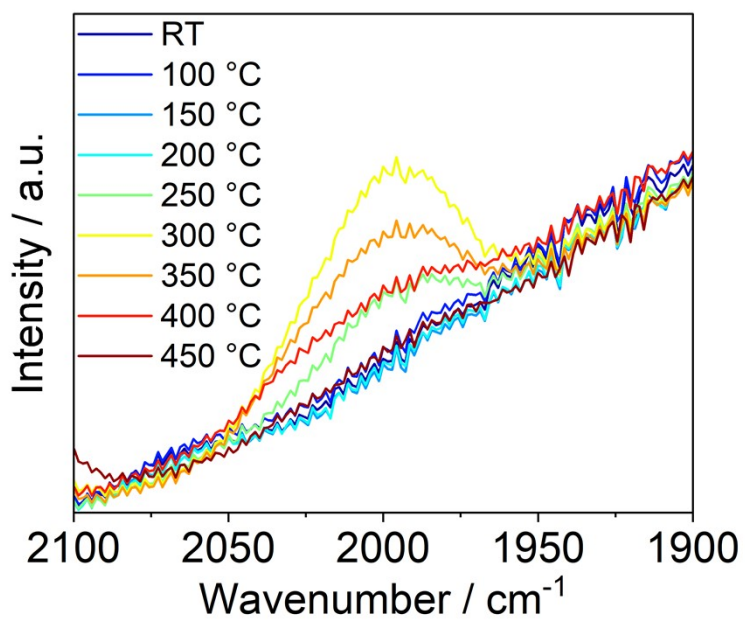

Fig. S11 *In situ* DRIFTS spectra of LTO\_TEA in 2100-1900  $\text{cm}^{-1}$  region.



**Table S1** The slope of calibration curves prepared by introducing each gas into the TPD chamber using a gas reservoir tank of known volume.

| The slope of calibration curves / $\mu\text{mol} \cdot \text{s}^{-1}$ |         |
|-----------------------------------------------------------------------|---------|
| H <sub>2</sub>                                                        | 703300  |
| CO                                                                    | 844300  |
| CO <sub>2</sub>                                                       | 904500  |
| H <sub>2</sub> O                                                      | 803700  |
| N <sub>2</sub>                                                        | 824300  |
| HCN                                                                   | 521800  |
| NH <sub>3</sub>                                                       | 450700  |
| NO                                                                    | 2047800 |

**Table S2** N content before and after TPD measurements determined from CHN elemental analysis.

|         | Before TPD measurement<br>/ wt% | After TPD measurement<br>/wt% |
|---------|---------------------------------|-------------------------------|
| LTO_TEA | 1.13                            | 0.14                          |
| LTO_N   | 0.72                            | 0.06                          |
